# Supplementary material for: A multiplex centrality metric for complex social networks: sex, social status, and family structure predict multiplex centrality in rhesus macaques
Source: PeerJ. 2020 Mar 16;8:e8712. doi: 10.7717/peerj.8712 (PMC7081788; doi:10.7717/peerj.8712)
Supplement: Table S6 — Distributions of model coefficients were generated by performing 1,000 node-based network randomizations, recalculating grooming layer centrality ranks, and fitting Model 1 (Reversed Groom Layer Rank Rank*MatrilineSizeCategory + Sex + Rearing) to these new centrality ranks [file peerj-08-8712-s012.csv]

Model 1 Reversed Groom Layer Rank	(Intercept)	Sex (Male)	Rearing (NR)	Rank	MatSizeCat (5,10]	MatSizeCat (10,40]	Rank by MatSizeCat (5,10]	Rank by MatSizeCat (10,40]
ObsCoefs	0.7363	-0.3512	-0.2079	1.1352	-0.1187	0.3791	-0.3304	-0.7169
Quantile 0.975	1.3410	0.1379	0.2134	0.5460	0.4246	0.3664	0.7099	0.5256
Quantile 0.025	0.8461	-0.1491	-0.2880	-0.4683	-0.3408	-0.1984	-0.7471	-0.6380
p_value	0.0020	0.0000	0.1900	0.0000	0.4140	0.0340	0.4160	0.0220
RandomizedMean	1.1066	-0.0047	-0.0292	0.0447	0.0392	0.0793	-0.0364	-0.0695
RandomizedStdDev	0.1212	0.0717	0.1294	0.2567	0.1918	0.1448	0.3670	0.2905
